# Supplementary material for: Nanostructured CuO with a thin g-C3N4 layer as a highly efficient photocathode for solar water splitting
Source: Royal Society of Chemistry journal article supplement (doi:10.1039/d1ra02193a), 2021-01-01
Supplement: d1ra02193a1.pdf [file d1ra02193a1.pdf]

## Supporting Information

### **Nanostructured CuO with a thin g-C<sub>3</sub>N<sub>4</sub> layer as a highly efficient photocathode for solar water splitting**

Hyojung Bae<sup>a</sup>, Vishal Burungale<sup>b</sup>, Wonkyeong Na<sup>b</sup>, Hokyun Rho<sup>c</sup>, Sang-Wan Ryu<sup>a</sup>, Soon

Hyung Kang<sup>a</sup>, and Jun-Seok Ha<sup>b, \*</sup>

## Experimental Details

### 1. Materials

The materials used in the experiment included copper(II) sulfate (anhydrous, Sigma Aldrich), lactic acid (85%, FCC, Sigma Aldrich), and sodium hydroxide (pellets, Sigma Aldrich). Fluorine-doped tin oxide (FTO) coated glass with a surface resistivity of 8  $\Omega$ /sq and Cu wire with a diameter of 0.5 mm were purchased from Omniscience and Nilaco, respectively. All chemicals were of analytical grade and were used without purification.

### 2. Cu<sub>2</sub>O electrodeposition

The electrodeposition of Cu<sub>2</sub>O occurs as described by the following schematic reaction:

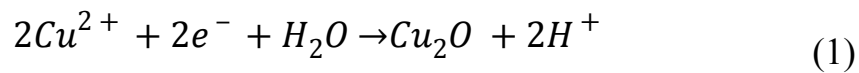

FTO films were cut into pieces with dimensions of 2 × 2 cm<sup>2</sup> and were sonicated in acetone, isopropyl alcohol (IPA), and distilled water for 15 min to remove any contaminants from their surfaces. A 0.2 M CuSO<sub>4</sub>·5H<sub>2</sub>O solution and a 3 M lactic acid solution were freshly prepared with distilled water. The pH values of the solutions were adjusted to just over 11 using NaOH. The experimental setup for Cu<sub>2</sub>O electrodeposition consisted of a three-electrode configuration with a Pt wire as the cathode, Ag/AgCl in saturated KCl as the

reference electrode, and an FTO film as the anode. The applied voltage was -0.6 V and the deposition times were 30, 45, and 60 min. The thicknesses of all the Cu<sub>2</sub>O films were determined using scanning electron microscopy (SEM). Fig. S1 shows that the thickness of Cu<sub>2</sub>O after 30, 45, and 60 min of deposition were approximately 3.4, 5.4, and 7.6 μm, respectively. Accordingly, the deposition rate of Cu<sub>2</sub>O was determined to be ~130 nm/min.

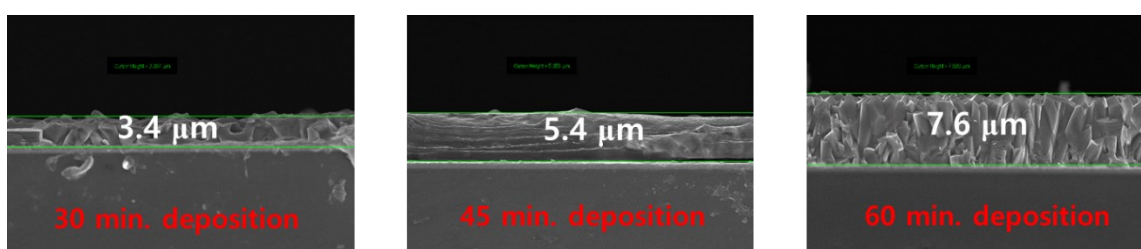

of Cu<sub>2</sub>O was determined to be ~130 nm/min.

### 3. Photoelectrochemical (PEC) performance of Cu<sub>2</sub>O depending on

**Fig. S1. Cross-section images of Cu<sub>2</sub>O electrodeposition with respect to deposition time**

The PEC performance was assessed using a Parstat 4000 potentiostat with a

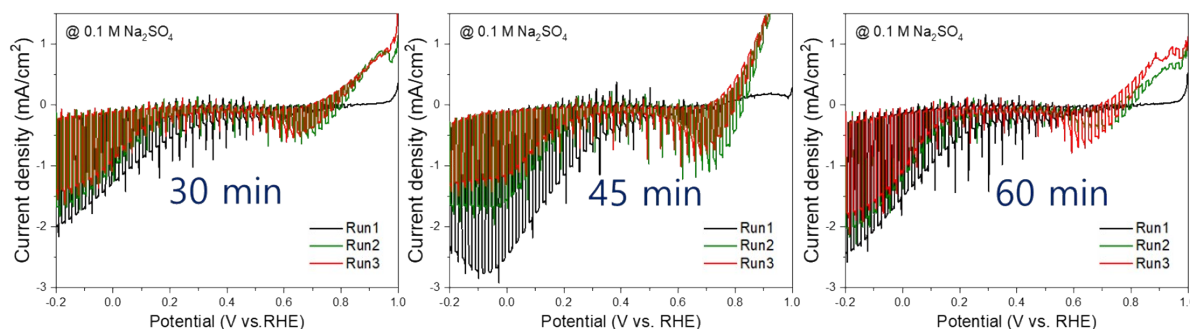

**Fig. S2. Linear sweep voltammetry measurements of the Cu<sub>2</sub>O thin film under chopped illumination with 1-s on/off intervals.**

NaOH (1 M) solution as the electrolyte. Fig. S2 shows the chopped photocurrent density of the  $\text{Cu}_2\text{O}$  thin film with respect to the deposition time, where the highest photocurrent density was achieved at 45 min; however, the stability was low. Therefore, considering both efficiency and stability, we chose the  $\text{Cu}_2\text{O}$  thin film prepared with a deposition time of 60 min for our subsequent experiments.

#### 4. Fabrication of the $\text{g-C}_3\text{N}_4/\text{CuO}$ thin film

The optimized  $\text{Cu}_2\text{O}$  thin film was used to fabricate the  $\text{g-C}_3\text{N}_4/\text{CuO}$  thin film. First, 2 g of a urea precursor was dissolved in 10 mL of methanol, and the solution was stirred for 1 h at room temperature. Thereafter,  $\text{Cu}_2\text{O}$  was dipped in the solution for 30 min. The prepared samples were subsequently placed in an oven at 80 °C for 1 h. The samples were then placed in crucibles with covers, which were moved to a muffle furnace for 3 h at 520 °C. After cooling to an ambient temperature, the  $\text{g-C}_3\text{N}_4/\text{CuO}$  thin film was obtained. The process for obtaining  $\text{CuO}$  was identical to that used to prepare  $\text{g-C}_3\text{N}_4/\text{CuO}$ , except the urea

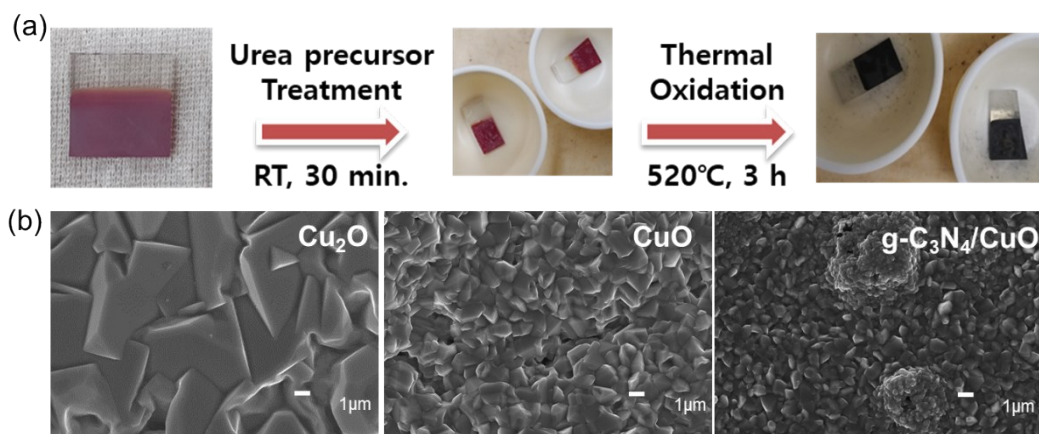

Fig. S3. (a) Fabrication procedure and (b) SEM images of  $\text{CuO}$  and  $\text{g-C}_3\text{N}_4/\text{CuO}$  thin films.

precursor treatment was not employed. The fabrication procedure is illustrated in Fig. S3(a).

Before the thermal oxidation stage,  $\text{Cu}_2\text{O}$  was brown. After the  $\text{Cu}_2\text{O}$  film was dipped in the urea–methanol solution, transparent particles formed on its surface. After thermal oxidation,  $\text{Cu}_2\text{O}$  turned into black  $\text{CuO}$ . The surface morphologies of the resulting  $\text{Cu}_2\text{O}$ ,  $\text{CuO}$ , and  $\text{g-C}_3\text{N}_4/\text{CuO}$  thin films were observed using SEM (Fig. S3(b)). The  $\text{Cu}_2\text{O}$  thin film had a larger grain boundary than that of the  $\text{CuO}$  thin film. Interestingly, unlike  $\text{CuO}$ , the  $\text{g-C}_3\text{N}_4/\text{CuO}$  thin film featured self-assembled regions. These regions were mainly attributed to the use of the urea precursor during thermal oxidation. Moreover, the cross-section SEM images of the  $\text{CuO}$  show that the  $\text{CuO}$  nanostructure is well formed (Fig. S4).

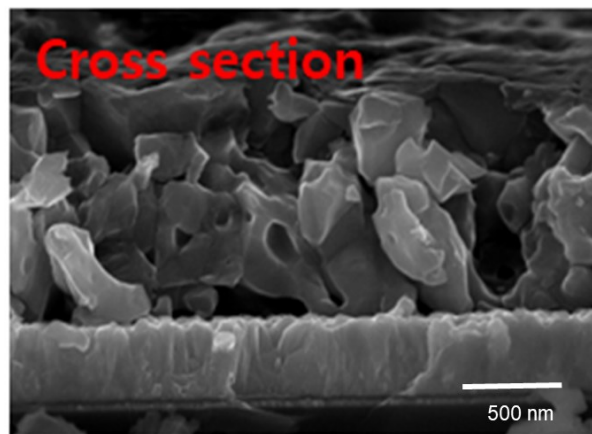

**Fig. S4. Cross-section SEM images of the  $\text{CuO}$  thin film.**

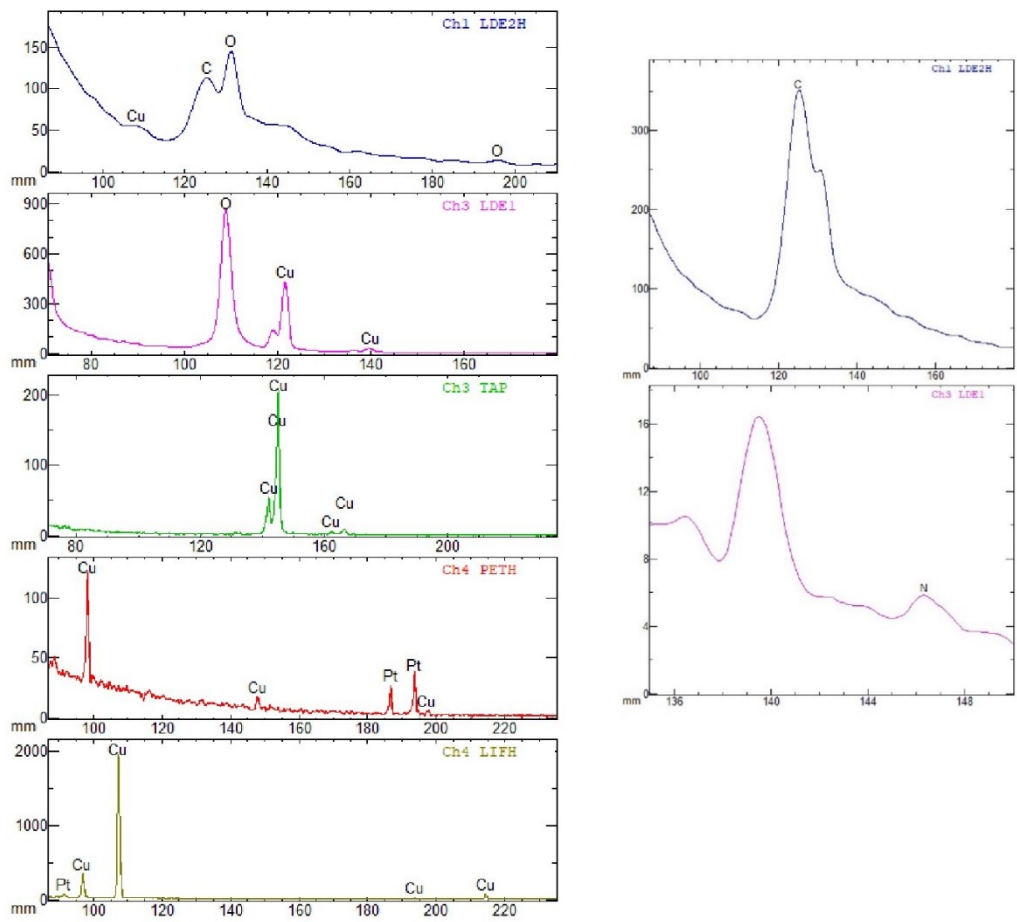

Fig. S5. Electron probe X-ray micro analyzer results for the g-C<sub>3</sub>N<sub>4</sub>/CuO thin film.

## 5. PEC properties of the g-C<sub>3</sub>N<sub>4</sub>/CuO thin film

### H<sub>2</sub> evolution detection by gas chromatography

The experiments used to detect the hydrogen generated were carried out in a sealed cell, as shown Fig. S6. The working electrode was g-C<sub>3</sub>N<sub>4</sub>/CuO and platinum wire was used as the counter electrode. Inert gas (CO<sub>2</sub>) was continuously flowed through the PEC cell, and a portion of the exiting gas was directed into an Micro GC Fusion (INFICON, Switzerland) with a thermal conductivity detector (TCD) and fast cycling time. The GC-TCD analyses were split into two column, MolSieve 5A and PLOT Q column. The Faradaic efficiency of the CO<sub>2</sub> reduction gaseous product is calculated as below;

$$\text{FE (\%)} = \frac{F \times n_e \times \chi \times F_r}{I}$$

where F is the Faraday constant (96485 C/mol), n<sub>e</sub> is the number of the electrons required for a hydrogen evolution, x is the mole fraction of the gaseous product obtained from the GC, FCO<sub>2</sub> is the molar flow rate of CO<sub>2</sub> through the cell, and I is the average current during the run. The faradic efficiency of hydrogen evolution for g-C<sub>3</sub>N<sub>4</sub>/CuO photocathode was found to be about 47.35%.

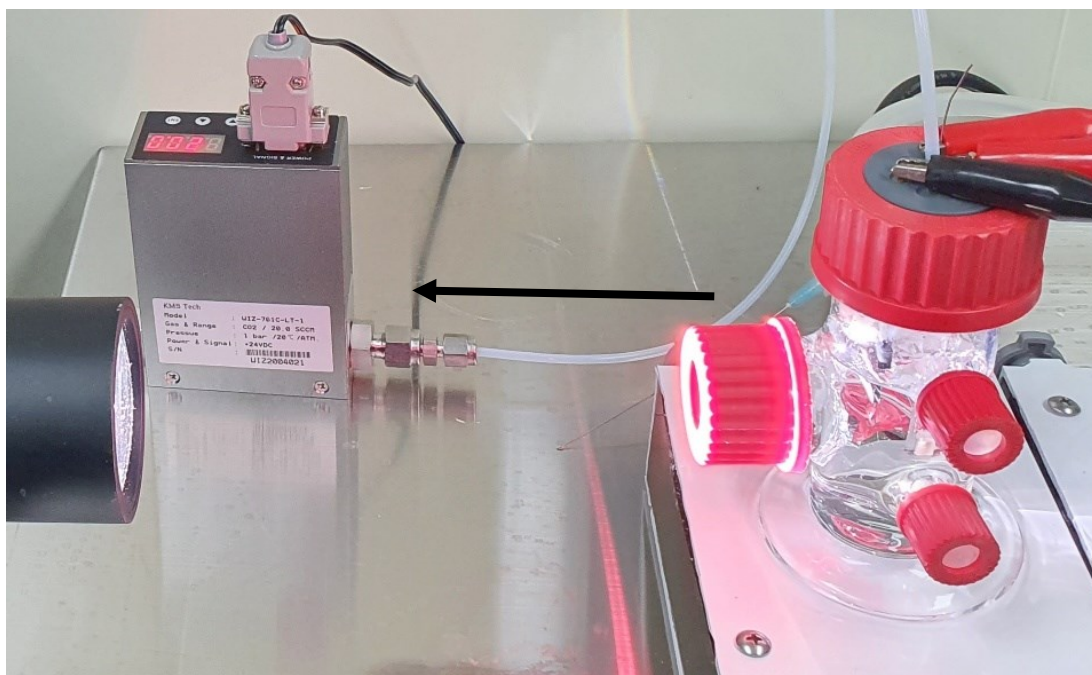

Fig. S6. Experimental setup with Xe lamp for water splitting using g-C<sub>3</sub>N<sub>4</sub>/CuO photocathode.

Arrow denote flow direction of CO<sub>2</sub> inert gas with flow rate of 20 sccm.
